# Supplementary material for: Actin contraction controls nuclear blebbing and rupture independent of actin confinement
Source: PubMed Central journal article supplement — Mol Biol Cell. 2024 Jan 12;35(2):ar19. doi: 10.1091/mbc.E23-07-0292 (PMC10881147; doi:10.1091/mbc.e23-07-0292), 2024-01-12
Supplement: mbc-35-ar19-s001.pdf [file mbc-35-ar19-s001.pdf]

# Supplemental Materials

*Molecular Biology of the Cell*

Pho *et al.*

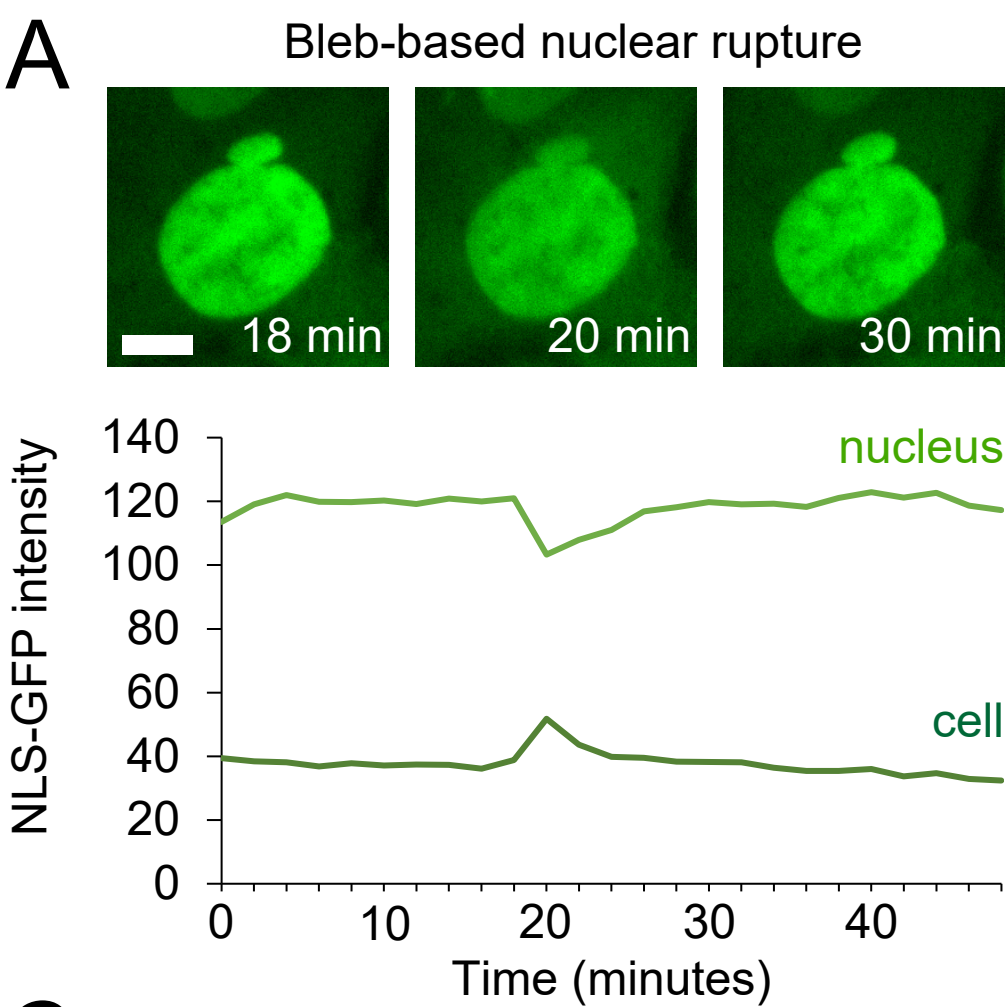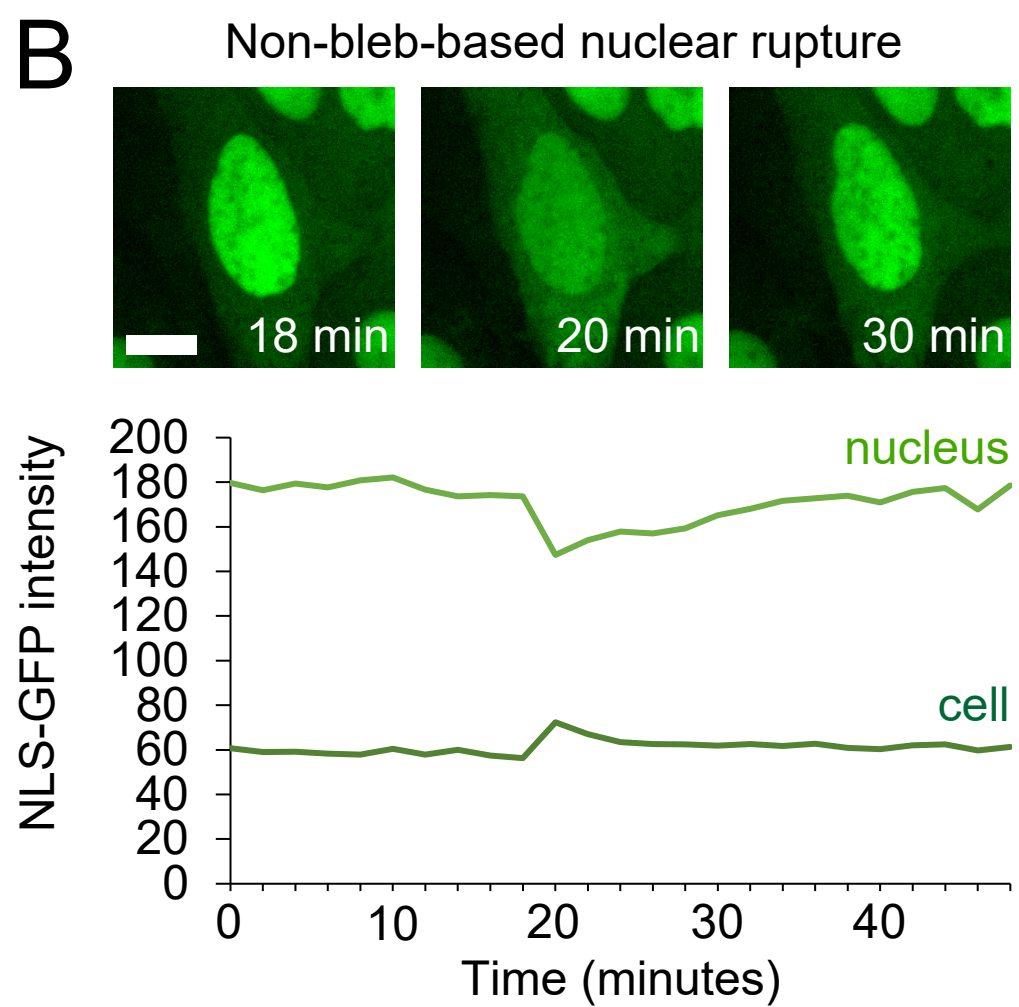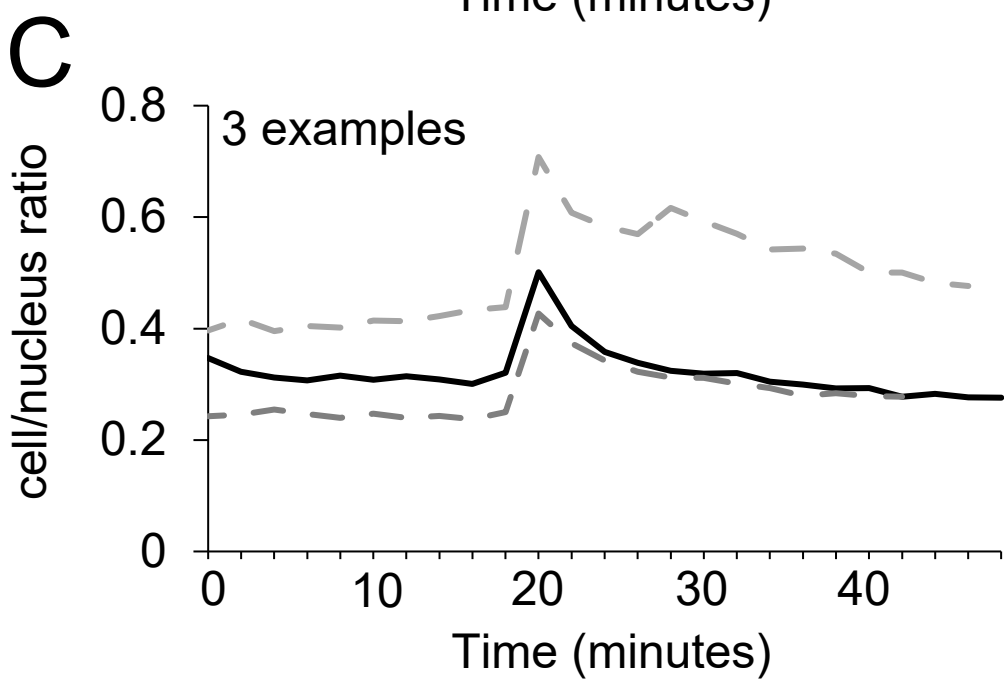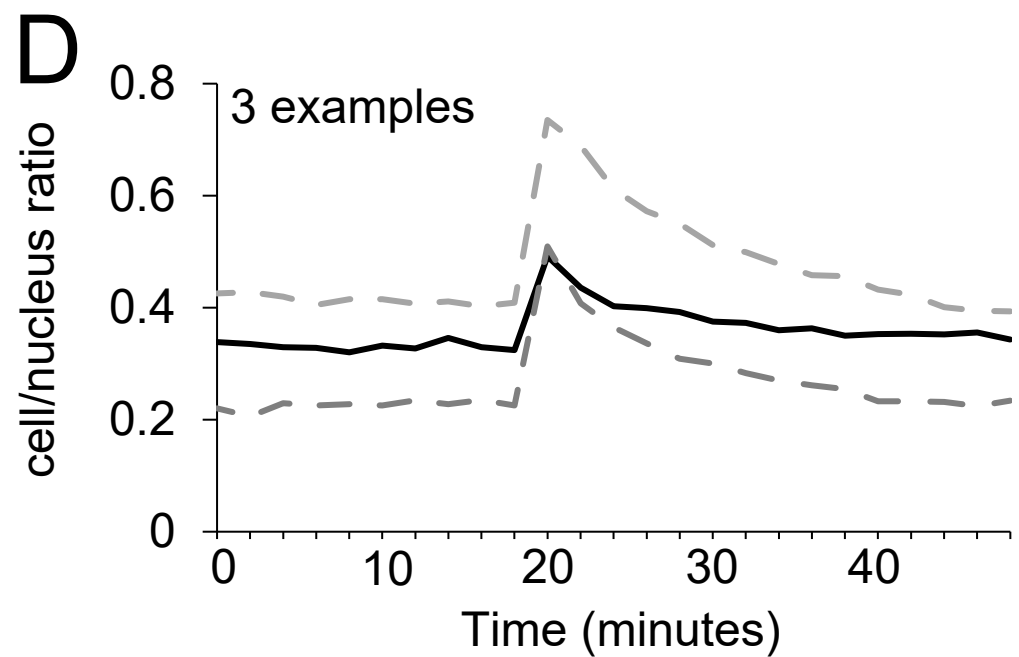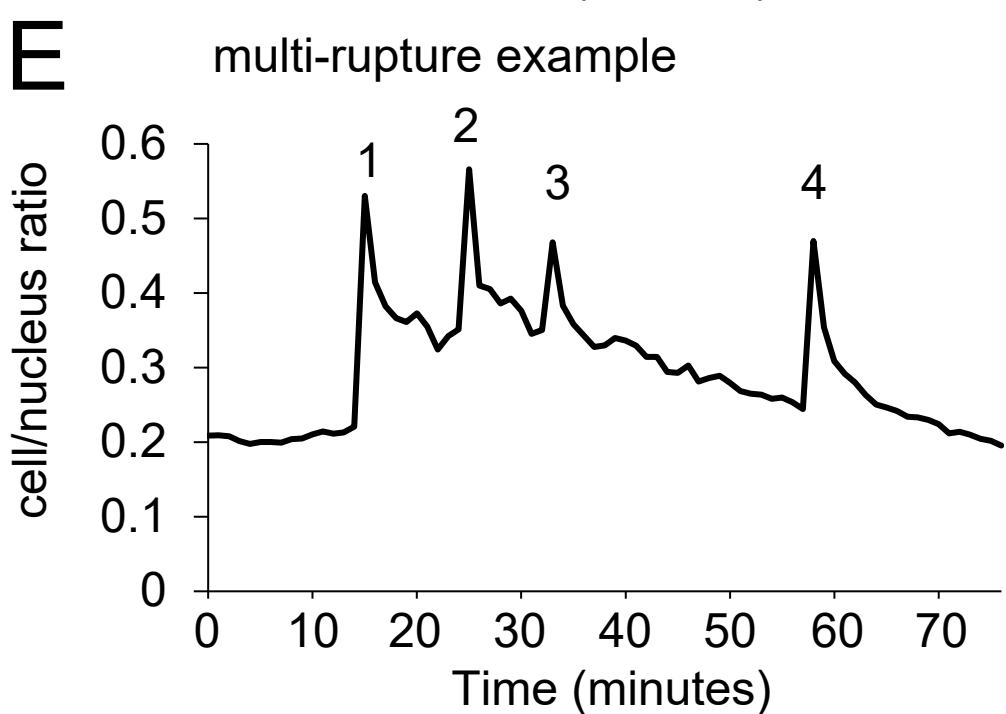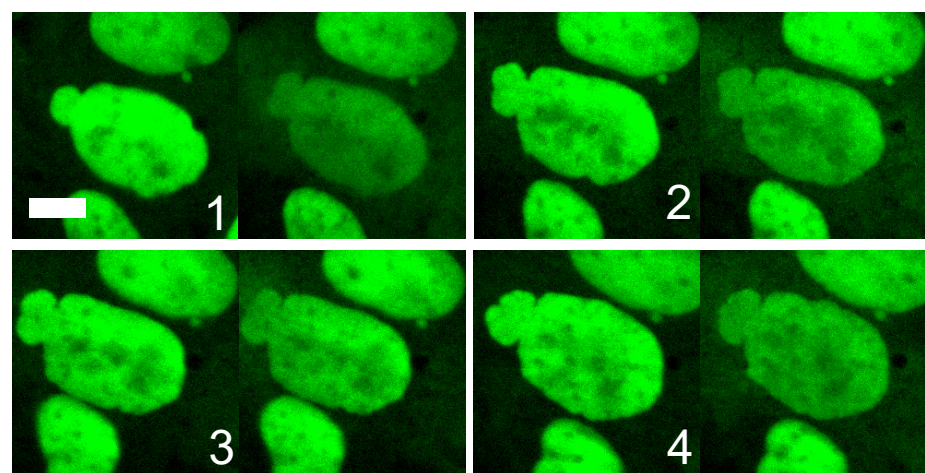

**A**

Circularity

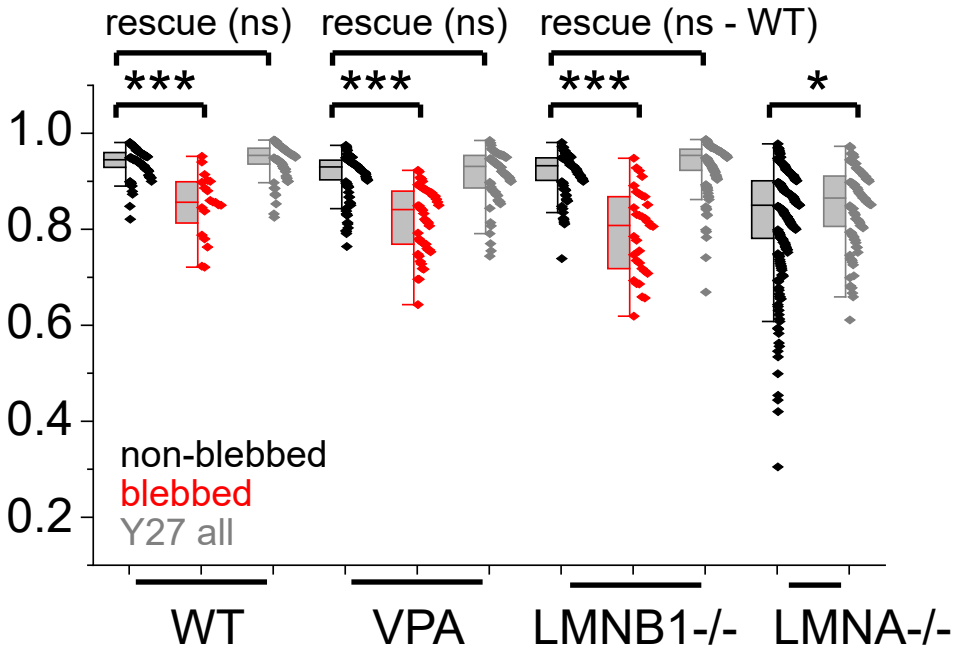

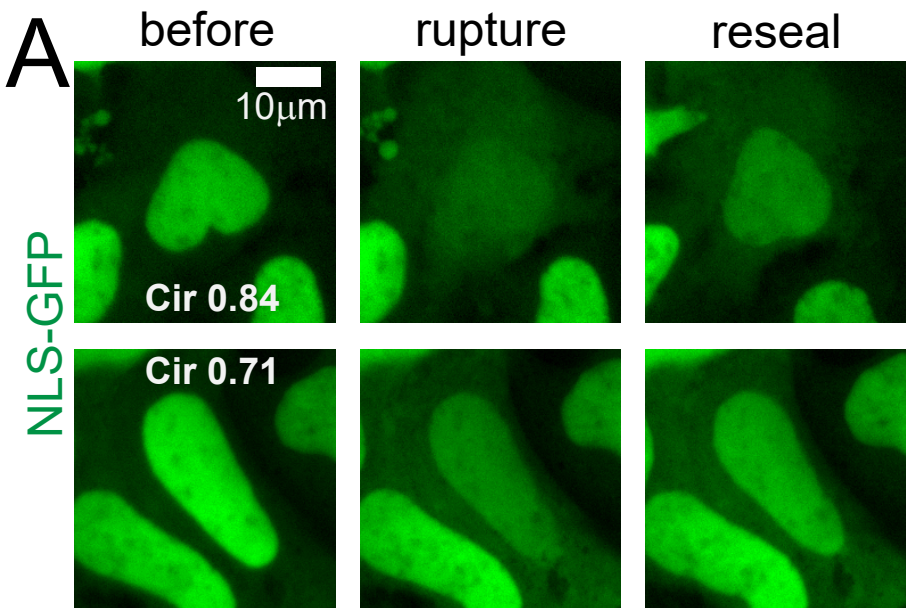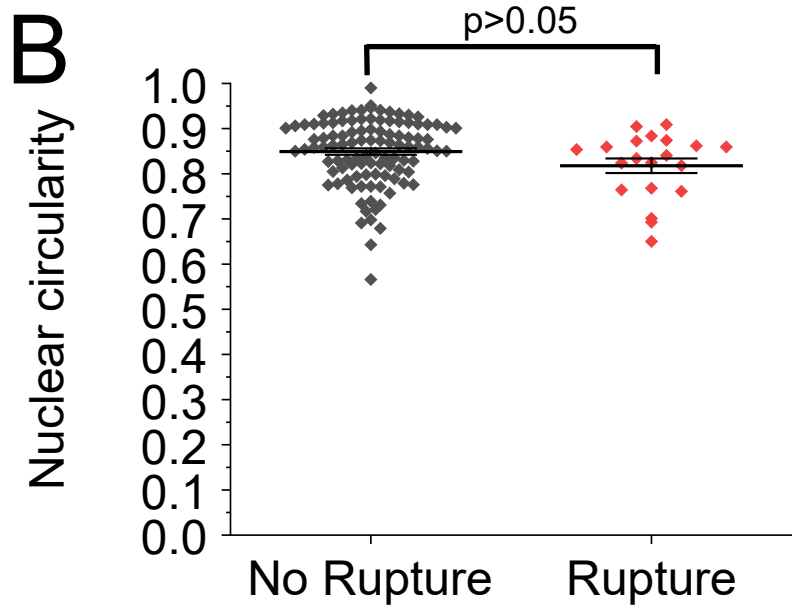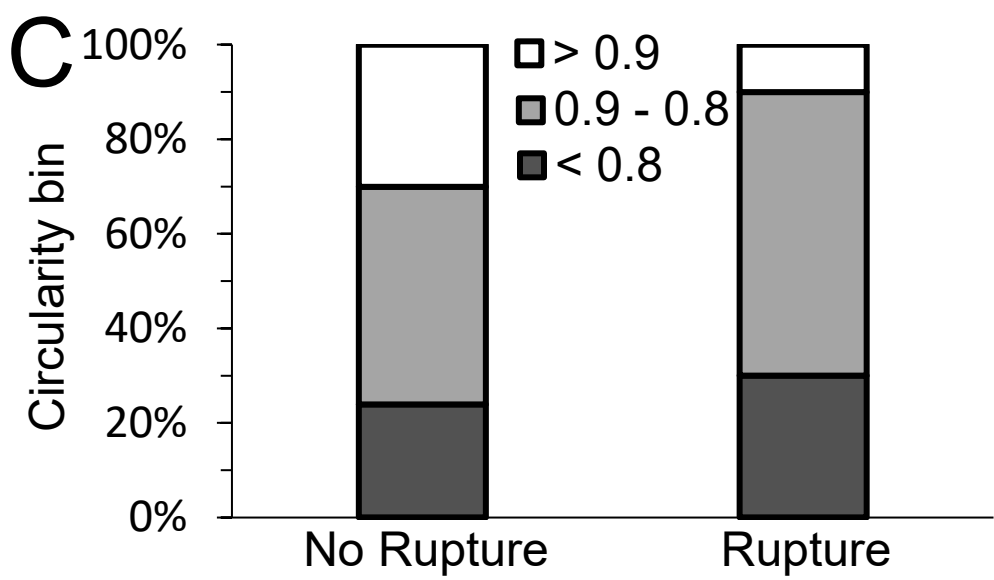

**A**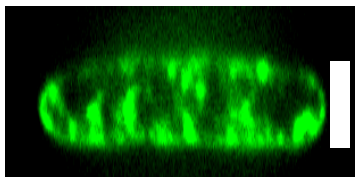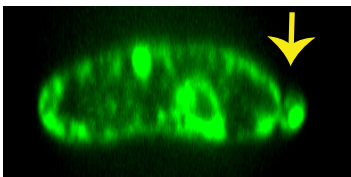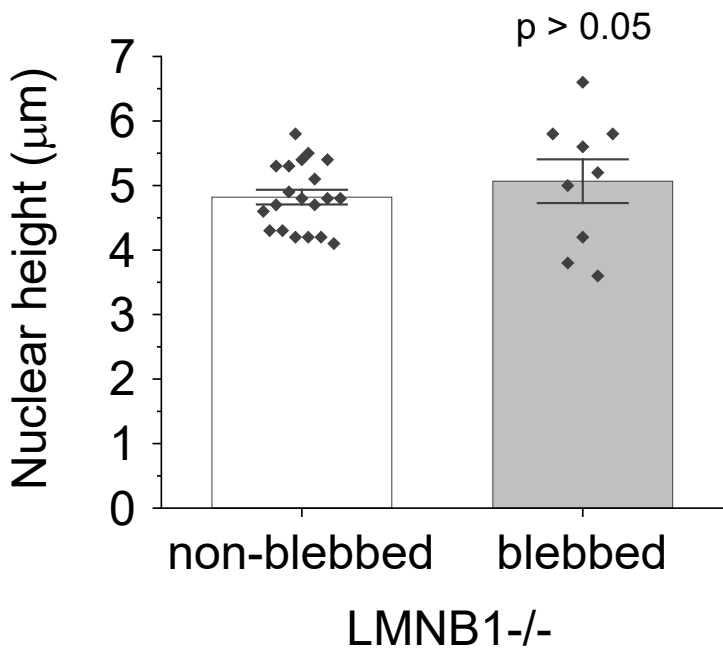**B**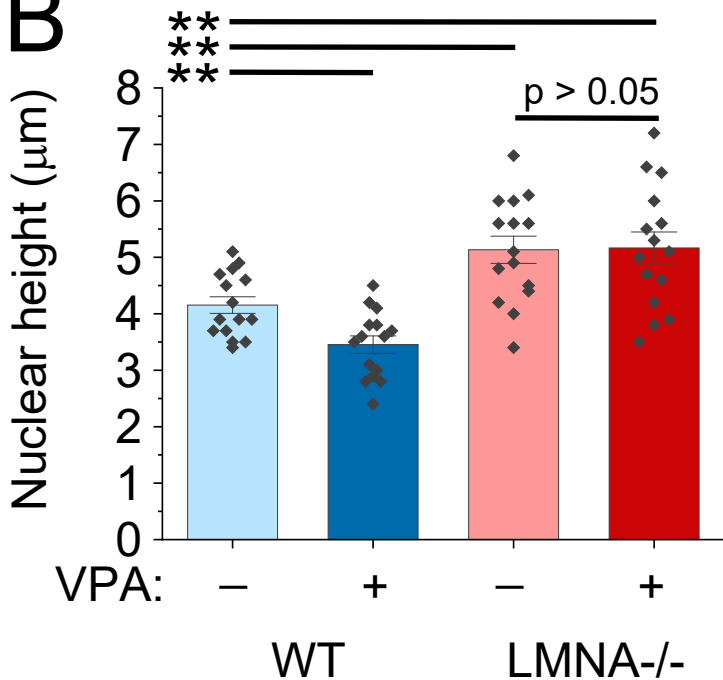

WT  
M1

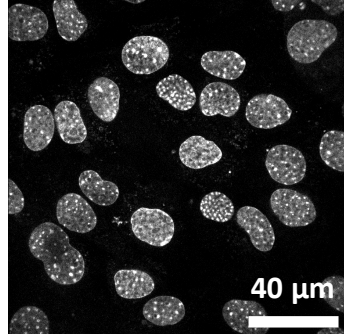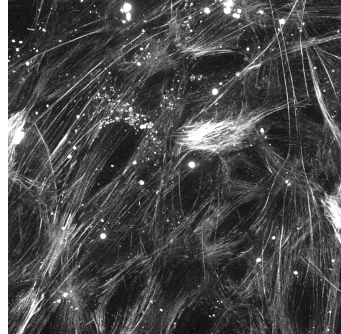

Y27  
M1

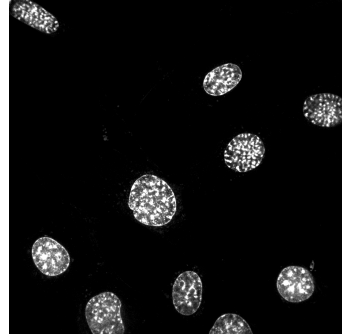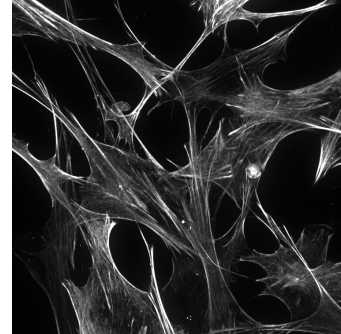

CN03  
M1

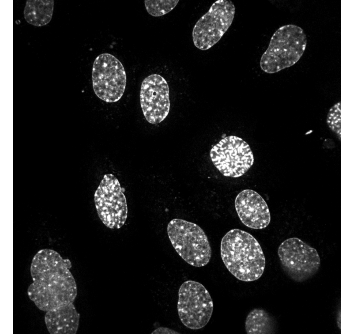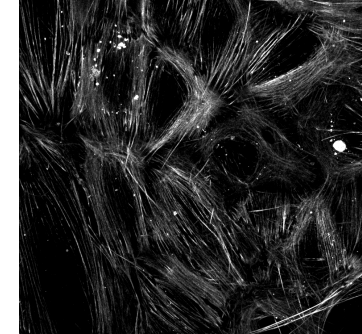

WT  
M2

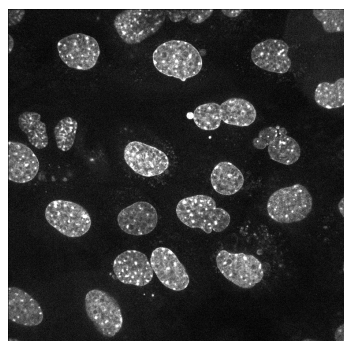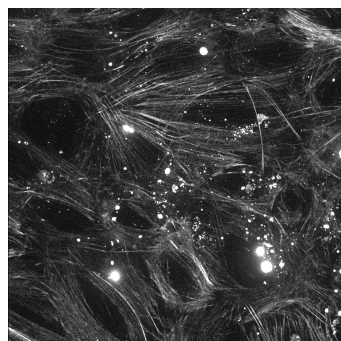

Y27  
M2

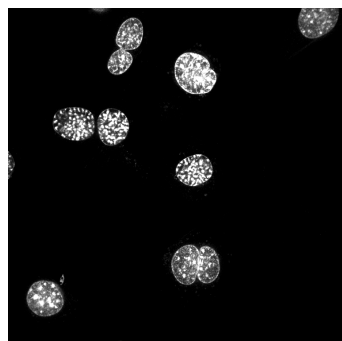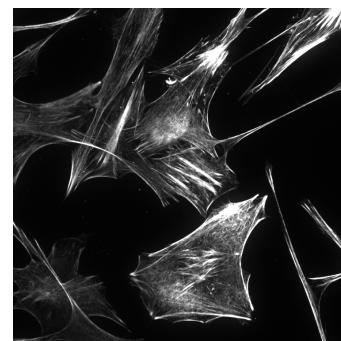

CN03  
M2

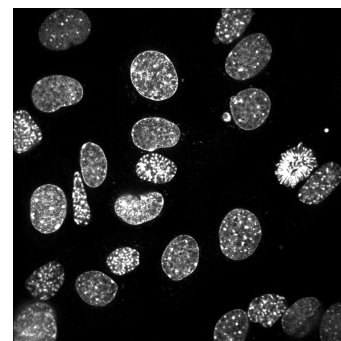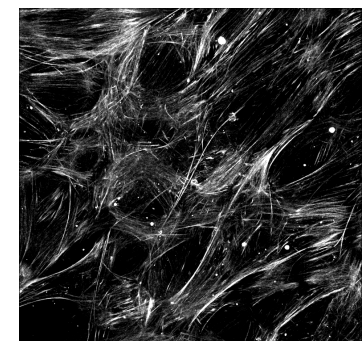

WT  
M3

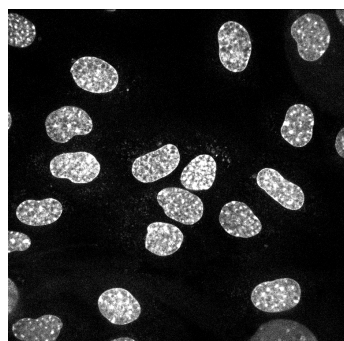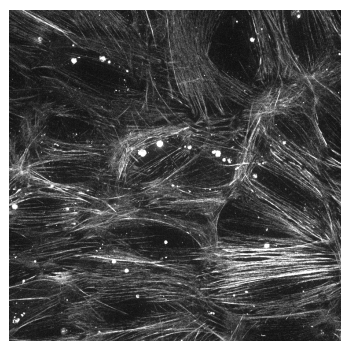

Y27  
M3

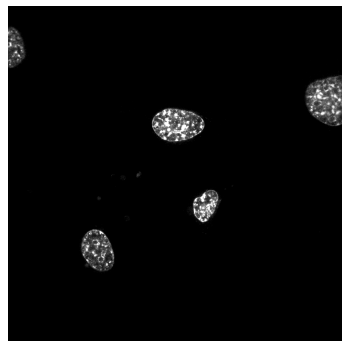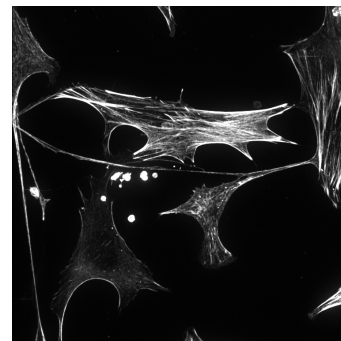

CN03  
M3

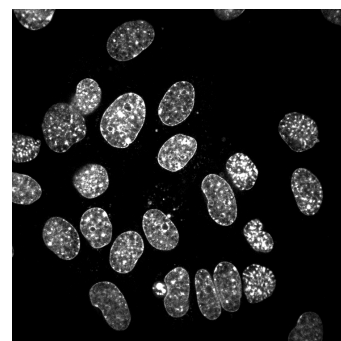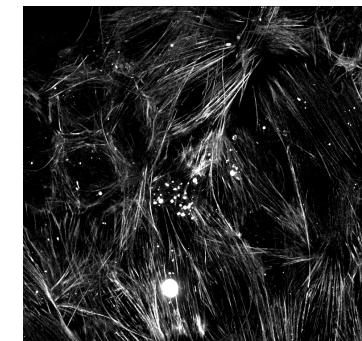

WT  
M4

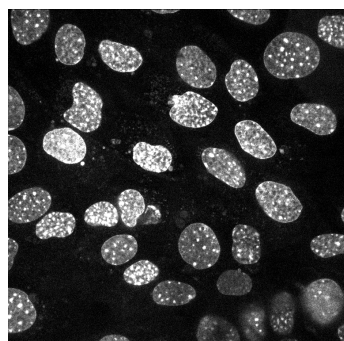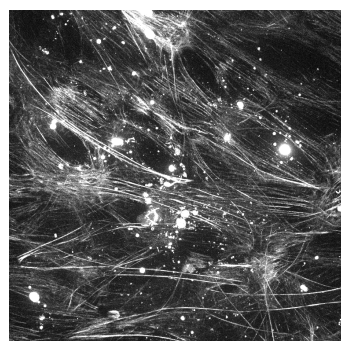

Y27  
M4

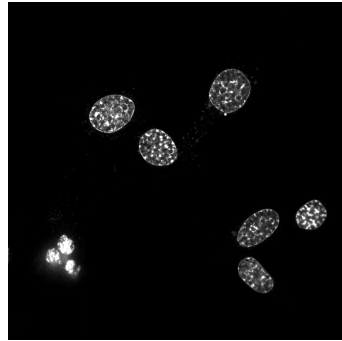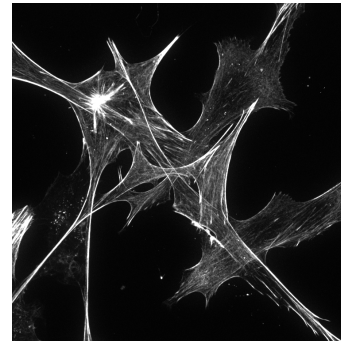

CN03  
M4

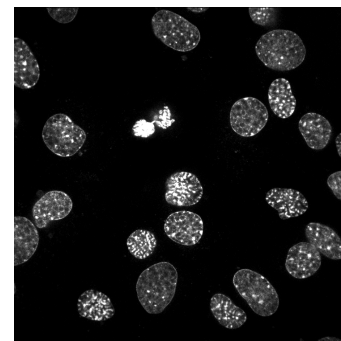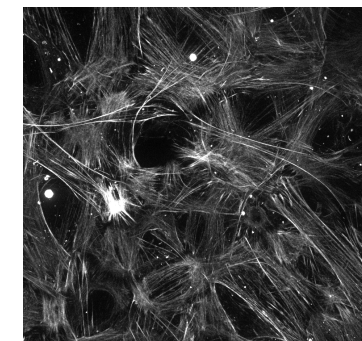

**Video 1. Bleb-based nuclear rupture.** Example video of a MEF cell expressing NLS-GFP which is concentrated in a blebbed nucleus but spills into the cytoplasm upon rupture. Quantification shown in Supplemental Figure 1.

**Video 2. Non-bleb-based nuclear rupture.** Example video of a MEF cell expressing NLS-GFP which is concentrated in a normally ellipse shaped nucleus but spills into the cytoplasm upon rupture. Quantification shown in Supplemental Figure 1.

**Video 3. Single nucleus multiple bleb-based nuclear ruptures.** Example video of a MEF cell expressing NLS-GFP which is concentrated in a blebbed nucleus but spills into the cytoplasm upon rupture multiple times in the same nucleus. Each rupture is followed by healing and re-concentration of the NLS-GFP in the cytoplasm in about 10 minutes. Quantification shown in Supplemental Figure 1.
